# Supplementary material for: Comparison of pregnancy outcomes following fresh and electively frozen single blastocyst transfer in natural cycle and clomiphene-stimulated IVF cycles
Source: PubMed Central journal article supplement — Hum Reprod Open. 2018 Apr 25;2018(3):hoy006. doi: 10.1093/hropen/hoy006 (PMC6276691; doi:10.1093/hropen/hoy006), 2018-04-25
Supplement: hoy006suppl_table1.pdf [file hoy006suppl_table1.pdf]

**Supplementary Table S1 IVF outcomes in natural and clomiphene citrate cycles.**

|                                        | Natural cycle | Clomiphene citrate cycle | P-value |
|----------------------------------------|---------------|--------------------------|---------|
| No. of oocyte retrieval cycles         | 458           | 1683                     |         |
| E2 at the time of trigger (pg/mL)      | 314.2 ± 18.4  | 835.3 ± 9.7              | <0.01   |
| P4 at the time of trigger (ng/mL)      | 0.6 ± 0.0     | 0.6 ± 0.0                | 0.53    |
| No. of oocytes retrieved               | 1.2 ± 0.1     | 2.2 ± 0.0                | <0.01   |
| No. of oocytes inseminated             | 506           | 3653                     |         |
| Conventional IVF (%)                   | 202 (39.9)    | 1535 (42.0)              | 0.01    |
| ICSI (%)                               | 304 (60.1)    | 2118 (58.0)              | 0.01    |
| No. of oocytes fertilized <sup>a</sup> | 410 (81.0)    | 2928 (80.2)              | 0.64    |
| No. of blastocysts <sup>b</sup>        | 214 (52.2)    | 1562 (53.3)              | 0.66    |

No., number; E2, oestradiol level; P4, progesterone level. Data are presented as *n* or mean ± SEM, unless indicated otherwise.

<sup>a</sup>Data are presented as *n* (%), per no. of mature oocytes).

<sup>b</sup>Data are presented as *n* (%), per no. of fertilized oocytes).
